# Supplementary material
Source: PubMed Central journal article supplement (PMC6713646)
Supplement: mmc1.pdf [file mmc1.pdf]

**Biophysical Journal, Volume 117**

**Supplemental Information**

**Na-K-2Cl Cotransporter and Store-Operated Ca<sup>2+</sup> Entry in Pacemaking  
by Interstitial Cells of Cajal**

**Jae Boum Youm, Haifeng Zheng, Sang Don Koh, and Kenton M. Sanders**

## Supplement equations

### A1. Membrane potential

$$\frac{dV}{dt} = \frac{-(I_{\text{total}} + I_{\text{ext}})}{C_m} \#(1)$$

$$I_{\text{total}} = I_{\text{CaL}} + I_{\text{CaT}} + I_{\text{K1}} + I_{\text{NaLCN}} + I_{\text{ClCa}} + I_{\text{Clb}} + I_{\text{Orai}} + I_{\text{NaCa}} + I_{\text{NaK}} \#(2)$$

### A2. Constant field equation

$$CF_X = z_X \cdot \frac{F \cdot V}{R \cdot T} \cdot \frac{[X]_i - [X]_o \cdot e^{-z_X \frac{F \cdot V}{R \cdot T}}}{1 - e^{-z_X \frac{F \cdot V}{R \cdot T}}} \#(3)$$

$$CF_{X,\text{md}} = z_X \cdot \frac{F \cdot V}{R \cdot T} \cdot \frac{[X]_{\text{md}} - [X]_o \cdot e^{-z_X \frac{F \cdot V}{R \cdot T}}}{1 - e^{-z_X \frac{F \cdot V}{R \cdot T}}} \#(4)$$

### A3. L-type $\text{Ca}^{2+}$ current ( $I_{\text{CaL}}$ )

$$I_{\text{CaL}} = I_{\text{CaLCa}} + I_{\text{CaLNa}} + I_{\text{CaLK}} \#(5)$$

$$I_{\text{CaLCa}} = P_{\text{CaL}} \cdot CF_{\text{Ca}} \cdot m \cdot h \#(6)$$

$$I_{\text{CaLNa}} = 0.00005 \cdot P_{\text{CaL}} \cdot CF_{\text{Na}} \cdot m \cdot h \#(7)$$

$$I_{\text{CaLK}} = 0.001 \cdot P_{\text{CaL}} \cdot CF_{\text{K}} \cdot m \cdot h \#(8)$$

$$P_{\text{CaL}} = 57.6 \#(9)$$

$$\alpha_m = 0.002175 \cdot \frac{V + 30}{1 - e^{-\frac{V+30}{2.5}}} \#(10)$$

$$\beta_m = 0.0006315 \cdot \frac{V}{e^{2.5} - 1} \#(11)$$

$$\alpha_h = 1.775 \cdot 10^{-6} \cdot \frac{V + 34}{e^{5.633} - 1} \#(12)$$

$$\beta_h = 0.427 \cdot [\text{Ca}^{2+}]_i \cdot \frac{V + 64}{1 + e^{-\frac{V+44}{4.16}}} \#(13)$$

### A4. T-type $\text{Ca}^{2+}$ current ( $I_{\text{CaT}}$ )

$$I_{\text{CaT}} = P_{\text{CaT}} \cdot CF_{\text{Ca}} \cdot d \cdot f \#(14)$$

$$P_{\text{CaT}} = 7.92 \#(15)$$

$$d_{\infty} = \frac{1}{1 + e^{-\frac{V+26}{6}}} \#(16)$$

$$\tau_d = 0.6 + \frac{5.4}{1 + e^{0.03 \cdot (V+100)}} \#(17)$$

$$\alpha_d = \frac{d_{\infty}}{\tau_d} \#(18)$$

$$\beta_d = \frac{1 - d_{\infty}}{\tau_d} \#(19)$$

$$f_{\infty} = \frac{1}{1 + e^{-\frac{V+66}{6}}} \#(20)$$

$$\tau_f = 10 + \frac{400}{1 + e^{0.02 \cdot (V+65)}} \#(21)$$

$$\alpha_f = \frac{f_{\infty}}{\tau_f} \#(22)$$

$$\beta_f = \frac{1 - f_{\infty}}{\tau_f} \#(23)$$

#### A5. Inward rectifier K<sup>+</sup> current ( $I_{K1}$ )

$$I_{K1} = G_{K1} \cdot \left( \frac{[K^+]_o}{5.4} \right)^{0.4} \cdot \frac{(V - E_K - 1.73)}{1 + e^{\frac{1.613 \cdot F}{R \cdot T} \cdot (V - E_K - 1.73)}} + a_{K1} \cdot b_{K1} \#(24)$$

$$G_{K1} = 18.0 \#(25)$$

$$E_K = \frac{R \cdot T}{F} \cdot \log \frac{[K^+]_o}{[K^+]_i} \#(26)$$

$$a_{K1} = 10 + \frac{48}{e^{\frac{V+37}{25}} + e^{-\frac{V+37}{25}}} \#(27)$$

$$b_{K1} = \frac{0.0001}{1 + e^{-\frac{V - E_K - 76.77}{17}}} \#(28)$$

#### A6. Na<sup>+</sup>-leak current ( $I_{NaLCN}$ )

$$I_{NaLCN} = I_{NaLCN}Na + I_{NaLCN}K \#(29)$$

$$I_{NaLCN}Na = P_{NaLCN} \cdot CF_{Na} \#(30)$$

$$I_{NaLCN}K = 0.9 \cdot P_{NaLCN} \cdot CF_K \#(31)$$

$$P_{\text{NaLCN}} = 0.1485 \#(32)$$

### A7. $\text{Ca}^{2+}$ -activated Cl current ( $I_{\text{ClCa}}$ )

$$I_{\text{ClCa}} = g_{\text{ClCa}} \cdot O_{\text{ClCa}} \cdot (V - E_{\text{Cl}}) \#(33)$$

$$g_{\text{ClCa}} = 20.0 \#(34)$$

$$E_{\text{Cl}} = \frac{R \cdot T}{F} \cdot \log \frac{[\text{Cl}^-]_{\text{cld}}}{[\text{Cl}^-]_{\text{o}}} \#(35)$$

$$O_{\text{ClCa}\infty} = \left[ (1 + e^{(V_h - V)/0.0156}) \left( 1 + \left( \frac{\text{EC}_{50}}{[\text{Ca}^{2+}]_{\text{Ano1}}} \right)^2 \right) \right]^{-1} \#(36)$$

$$V_h = -100 \text{ mV} \#(37)$$

$$\tau = t_1 + t_2 \cdot e^{V/t_3} \#(38)$$

$$t_1 = 48.978 \cdot e^{-0.57[\text{Ca}^{2+}]_{\text{Ano1}}} \#(39)$$

$$t_2 = 45.702 \cdot e^{-0.05374[\text{Ca}^{2+}]_{\text{Ano1}}} \#(40)$$

$$t_3 = 133.57 \cdot e^{0.153[\text{Ca}^{2+}]_{\text{Ano1}}} \#(41)$$

$$\text{EC}_{50(0\text{mV})} = 1.39 \cdot 10^{-3} \text{ mM} \#(42)$$

$$\text{EC}_{50} = \text{EC}_{50(0\text{mV})} \cdot e^{-k_c \cdot V} \text{ mM} \#(43)$$

$$k_c = 5.4912 \cdot 10^{-3} \#(44)$$

$$[\text{Ca}^{2+}]_{\text{Ano1}} = \frac{\left( -D_c \cdot K_m + \frac{\sigma}{2\pi r} + C_2 + \sqrt{\left( D_c \cdot K_m + \frac{\sigma}{2\pi r} + C_2 \right)^2 + 4D_c \cdot D_m \cdot B_m \cdot K_m} \right)}{2D_c} \#(45)$$

$$D_c = 250 \cdot 10^{-3} \mu\text{m}^2 \cdot \text{ms}^{-1} \#(46)$$

$$D_m = 75 \cdot 10^{-3} \mu\text{m}^2 \cdot \text{ms}^{-1} \#(47)$$

$$B_m = 50 \cdot 10^{-3} \text{ mM} \#(48)$$

$$K_m = 0.1 \cdot 10^{-3} \text{ mM} \#(49)$$

$$r = 0.05 \mu\text{m} \#(50)$$

$$n_{\text{Orai}} = 250 \#(51)$$

$$C_2 = D_c \cdot [Ca^{2+}]_i - \frac{D_m \cdot B_m \cdot K_m}{K_m + [Ca^{2+}]_i} \#(52)$$

$$\sigma = \frac{J_{Orai} \cdot Vol_{cyt}}{n_{Orai}} \#(53)$$

$$J_{Orai} = \frac{-I_{Orai}}{F \cdot Vol_{cyt}} \#(54)$$

#### A8. Background Cl<sup>-</sup> current ( $I_{Clb}$ )

$$I_{Clb} = P_{Clb} \cdot CF_{Cl} \#(55)$$

$$P_{Clb} = 0.1 \#(56)$$

#### A9. Current carried by store-operated Ca<sup>2+</sup> entry ( $I_{Orai}$ )

$$I_{Orai} = g_{Orai} \cdot O_{Orai} \cdot (V - E_{Ca}) \#(57)$$

$$E_{Ca} = \frac{R \cdot T}{2 \cdot F} \cdot \log \frac{[Ca^{2+}]_o}{[Ca^{2+}]_i} \#(58)$$

$$g_{Orai} = 0.028 \#(59)$$

$$O_{Orai} = \frac{(K_{m,Ca})^8}{(K_{m,Ca})^8 + (0.021 \cdot [Ca]_{rel})^8} \#(60)$$

$$K_{m,Ca} = 0.2 \text{ mM} \#(61)$$

#### A10. Na<sup>+</sup>/Ca<sup>2+</sup> exchange current ( $I_{NaCa}$ )

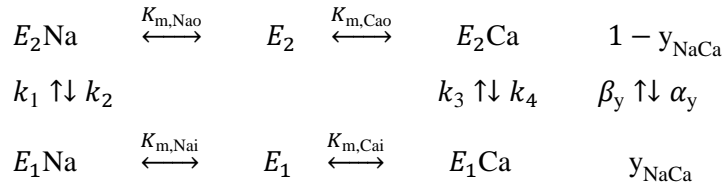

$$I_{NaCa} = P_{NaCa} \cdot (k_1 \cdot E_1Na \cdot y_{NaCa} - k_2 \cdot E_2Na \cdot (1 - y_{NaCa})) \#(62)$$

$$P_{NaCa} = 8.458 \text{ pA} \#(63)$$

$$k_1 = e^{\frac{0.32 \cdot F \cdot V}{R \cdot T}} \#(64)$$

$$k_2 = e^{\frac{(0.32-1) \cdot F \cdot V}{R \cdot T}} \#(65)$$

$$k_3 = 1 \#(66)$$

$$k_4 = 1 \#(67)$$

$$K_{m,Na_o} = 87.5 \text{ mM} \#(68)$$

$$K_{m,Ca_o} = 1.38 \text{ mM} \#(69)$$

$$K_{m,Na_i} = 4.375 \text{ mM} \#(70)$$

$$K_{m,Ca_i} = 0.00138 \text{ mM} \#(71)$$

$$\alpha_y = k_2 \cdot E_2Na + k_4 \cdot E_2Ca \#(72)$$

$$\beta_y = k_1 \cdot E_1Na + k_3 \cdot E_1Ca \#(73)$$

$$E_1Na = \left( 1 + \frac{1 + [Ca^{2+}]_{cld}/K_{m,Ca_i}}{([Na^+]_{cld}/K_{m,Na_i})^3} \right)^{-1} \#(74)$$

$$E_2Na = \left( 1 + \frac{1 + [Ca^{2+}]_o/K_{m,Ca_o}}{([Na^+]_o/K_{m,Na_o})^3} \right)^{-1} \#(75)$$

$$E_1Ca = \left( 1 + \frac{1 + ([Na^+]_{cld}/K_{m,Na_i})^3}{[Ca^{2+}]_{cld}/K_{m,Ca_i}} \right)^{-1} \#(76)$$

$$E_2Ca = \left( 1 + \frac{1 + ([Na^+]_o/K_{m,Na_o})^3}{[Ca^{2+}]_o/K_{m,Ca_o}} \right)^{-1} \#(77)$$

#### A11. Na<sup>+</sup>/K<sup>+</sup> pump current ( $I_{NaK}$ )

$$I_{NaK} = I_{NaK}A + I_{NaK}B \#(78)$$

$$I_{NaK}A = P_{NaK} \cdot \frac{0.7}{1 + (K_{m,Na_i}/[Na^+]_i)^{1.36}} \cdot \frac{1 - ((V + 50)/250)^2}{1 + K_{m,Ko}/[K^+]_o} \#(79)$$

$$I_{NaK}B = P_{NaK} \cdot \frac{7}{1 + (K_{m2,Na_i}/[Na^+]_i)^3} \cdot \frac{1 - ((V + 50)/250)^2}{1 + K_{m,Ko}/[K^+]_o} \#(80)$$

$$P_{NaK} = 27.65 \#(81)$$

$$K_{m,Na_i} = 3.5 \text{ mM} \#(82)$$

$$K_{m2,Na_i} = 18 \text{ mM} \#(83)$$

$$K_{m,Ko} = 0.27 \text{ mM} \#(84)$$

#### A12. Na-K-2Cl cotransporter (NKCC1)

$$J_{\text{NKCC,Na}} = P_{\text{NKCC}} \cdot (J_{\text{NKCC,Na influx}} - J_{\text{NKCC,Na efflux}}) \#(85)$$

$$J_{\text{NKCC,K}} = J_{\text{NKCC,Na}} \#(86)$$

$$J_{\text{NKCC,Cl}} = 2 \cdot J_{\text{NKCC,Na}} \#(87)$$

$$P_{\text{NKCC}} = 0.168 \#(88)$$

$$J_{E_1 \rightarrow E_1 \text{NaCl}} = \frac{v_1 \cdot v_2}{v_2 + v_{-1}} \#(89)$$

$$J_{E_1 \leftarrow E_1 \text{NaCl}} = \frac{v_{-2} \cdot v_{-1}}{v_2 + v_{-1}} \#(90)$$

$$J_{E_1 \rightarrow E_1 \text{NaClK}} = \frac{(J_{E_1 \rightarrow E_1 \text{NaCl}}) \cdot v_3}{v_3 + (J_{E_1 \leftarrow E_1 \text{NaCl}})} \#(91)$$

$$J_{E_1 \leftarrow E_1 \text{NaClK}} = \frac{(J_{E_1 \leftarrow E_1 \text{NaCl}}) \cdot v_{-3}}{v_3 + (J_{E_1 \leftarrow E_1 \text{NaCl}})} \#(92)$$

$$J_{E_1 \rightarrow E_1 \text{NaClKCl}} = \frac{(J_{E_1 \rightarrow E_1 \text{NaClK}}) \cdot v_4}{v_4 + (J_{E_1 \leftarrow E_1 \text{NaClK}})} \#(93)$$

$$J_{E_1 \leftarrow E_1 \text{NaClKCl}} = \frac{(J_{E_1 \leftarrow E_1 \text{NaClK}}) \cdot v_{-4}}{v_4 + (J_{E_1 \leftarrow E_1 \text{NaClK}})} \#(94)$$

$$J_{E_1 \rightarrow E_2 \text{NaClKCl}} = \frac{(J_{E_1 \rightarrow E_1 \text{NaClKCl}}) \cdot v_5}{v_5 + (J_{E_1 \leftarrow E_1 \text{NaClKCl}})} \#(95)$$

$$J_{E_1 \leftarrow E_2 \text{NaClKCl}} = \frac{(J_{E_1 \leftarrow E_1 \text{NaClKCl}}) \cdot v_{-5}}{v_5 + (J_{E_1 \leftarrow E_1 \text{NaClKCl}})} \#(96)$$

$$J_{\text{NKCC,Na influx}} = J_{E_1 \rightarrow E_2 \text{ClKCl}} = \frac{(J_{E_1 \rightarrow E_2 \text{NaClKCl}}) \cdot v_6}{v_6 + (J_{E_1 \leftarrow E_2 \text{NaClKCl}})} \#(97)$$

$$J_{\text{NKCC,Na efflux}} = J_{E_1 \leftarrow E_2 \text{ClKCl}} = \frac{(J_{E_1 \leftarrow E_2 \text{NaClKCl}}) \cdot v_{-6}}{v_6 + (J_{E_1 \leftarrow E_2 \text{NaClKCl}})} \#(98)$$

$$v_1 = k_{\text{on}}^{\text{ion}} \cdot [\text{Na}^+]_{\text{o}} \cdot [E_1] \#(99)$$

$$v_{-1} = (k_{\text{on}}^{\text{ion}} / K_{\text{Na}}) \cdot [E_1 \text{Na}] \#(100)$$

$$v_2 = k_{\text{on}}^{\text{ion}} \cdot [\text{Cl}^-]_{\text{o}} \cdot [E_1 \text{Na}] \#(101)$$

$$v_{-2} = (k_{\text{on}}^{\text{ion}} / K_{\text{Cl}}) \cdot [E_1 \text{NaCl}] \#(102)$$

$$v_3 = k_{\text{on}}^{\text{ion}} \cdot [\text{K}^+]_{\text{o}} \cdot [\text{E}_1\text{NaCl}] \#(103)$$

$$v_{.3} = (k_{\text{on}}^{\text{ion}}/K_{\text{K}}) \cdot [\text{E}_1\text{NaClK}] \#(104)$$

$$v_4 = k_{\text{on}}^{\text{ion}} \cdot [\text{Cl}^-]_{\text{o}} \cdot [\text{E}_1\text{NaClK}] \#(105)$$

$$v_{.4} = (k_{\text{on}}^{\text{ion}}/K_{\text{Cl}}) \cdot [\text{E}_1\text{NaClKCl}] \#(106)$$

$$v_5 = k_{\text{f}}^{\text{full}} \cdot [\text{E}_1\text{NaClKCl}] \#(107)$$

$$v_{.5} = k_{\text{b}}^{\text{full}} \cdot [\text{E}_2\text{NaClKCl}] \#(108)$$

$$v_6 = (k_{\text{on}}^{\text{ion}}/K_{\text{Na}}) \cdot [\text{E}_2\text{NaClKCl}] \#(109)$$

$$v_{.6} = k_{\text{on}}^{\text{ion}} \cdot [\text{Na}^+]_{\text{cld}} \cdot [\text{E}_2\text{ClKCl}] \#(110)$$

$$v_7 = (k_{\text{on}}^{\text{ion}}/K_{\text{Cl}}) \cdot [\text{E}_2\text{ClKCl}] \#(111)$$

$$v_{.7} = k_{\text{on}}^{\text{ion}} \cdot [\text{Cl}^-]_{\text{cld}} \cdot [\text{E}_2\text{KCl}] \#(112)$$

$$v_8 = (k_{\text{on}}^{\text{ion}}/K_{\text{K}}) \cdot [\text{E}_2\text{KCl}] \#(113)$$

$$v_{.8} = k_{\text{on}}^{\text{ion}} \cdot [\text{K}^+]_{\text{i}} \cdot [\text{E}_2\text{Cl}] \#(114)$$

$$v_9 = (k_{\text{on}}^{\text{ion}}/K_{\text{Cl}}) \cdot [\text{E}_2\text{Cl}] \#(115)$$

$$v_{.9} = k_{\text{on}}^{\text{ion}} \cdot [\text{Cl}^-]_{\text{cld}} \cdot [\text{E}_2] \#(116)$$

$$v_{10} = k_{\text{f}}^{\text{empty}} \cdot [\text{E}_2\text{Cl}] \#(117)$$

$$v_{.10} = k_{\text{b}}^{\text{empty}} \cdot [\text{E}_1] \#(118)$$

$$\begin{bmatrix} a_1 & a_2 & 0 & 0 & 0 & 0 & 0 & 0 & 0 & a_3 \\ b_1 & b_2 & b_3 & 0 & 0 & 0 & 0 & 0 & 0 & 0 \\ 0 & c_1 & c_2 & c_3 & 0 & 0 & 0 & 0 & 0 & 0 \\ 0 & 0 & d_1 & d_2 & d_3 & 0 & 0 & 0 & 0 & 0 \\ 0 & 0 & 0 & e_1 & e_2 & e_3 & 0 & 0 & 0 & 0 \\ 0 & 0 & 0 & 0 & f_1 & f_2 & f_3 & 0 & 0 & 0 \\ 0 & 0 & 0 & 0 & 0 & g_1 & g_2 & g_3 & 0 & 0 \\ 0 & 0 & 0 & 0 & 0 & 0 & h_1 & h_2 & h_3 & 0 \\ 0 & 0 & 0 & 0 & 0 & 0 & 0 & i_1 & i_2 & i_3 \\ 1 & 1 & 1 & 1 & 1 & 1 & 1 & 1 & 1 & 1 \end{bmatrix} \cdot \begin{bmatrix} [\text{E}_1] \\ [\text{E}_1\text{Na}] \\ [\text{E}_1\text{NaCl}] \\ [\text{E}_1\text{NaClK}] \\ [\text{E}_1\text{NaClKCl}] \\ [\text{E}_2\text{NaClKCl}] \\ [\text{E}_2\text{ClKCl}] \\ [\text{E}_2\text{KCl}] \\ [\text{E}_2\text{Cl}] \\ [\text{E}_2] \end{bmatrix} = \begin{bmatrix} 0 \\ 0 \\ 0 \\ 0 \\ 0 \\ 0 \\ 0 \\ 0 \\ 0 \\ 1 \end{bmatrix} \#(119)$$



$$\begin{bmatrix} a_1 & a_2 & a_3 \\ b_1 & b_2 & b_3 \\ c_1 & c_2 & c_3 \\ d_1 & d_2 & d_3 \\ e_1 & e_2 & e_3 \\ f_1 & f_2 & f_3 \\ g_1 & g_2 & g_3 \\ h_1 & h_2 & h_3 \\ i_1 & i_2 & i_3 \end{bmatrix} = \begin{bmatrix} -k_b^{\text{empty}} - k_{\text{on}}^{\text{ion}} \cdot [\text{Na}^+]_o & k_{\text{off}}^{\text{Na}} & k_f^{\text{empty}} \\ k_{\text{on}}^{\text{ion}} \cdot [\text{Na}^+]_o & -k_{\text{off}}^{\text{Na}} - k_{\text{ion}}^{\text{on}} \cdot [\text{Cl}^-]_o & k_{\text{off}}^{\text{Cl}} \\ k_{\text{on}}^{\text{ion}} \cdot [\text{Cl}^-]_o & -k_{\text{off}}^{\text{Cl}} - k_{\text{on}}^{\text{ion}} \cdot [\text{K}^+]_o & k_{\text{off}}^{\text{K}} \\ k_{\text{on}}^{\text{ion}} \cdot [\text{K}^+]_o & -k_{\text{off}}^{\text{K}} - k_{\text{on}}^{\text{ion}} \cdot [\text{Cl}^-]_o & k_{\text{off}}^{\text{Cl}} \\ k_{\text{on}}^{\text{ion}} \cdot [\text{Cl}^-]_o & -k_{\text{off}}^{\text{Cl}} - k_f^{\text{full}} & k_b^{\text{full}} \\ k_f^{\text{full}} & -k_b^{\text{full}} - k_{\text{off}}^{\text{Na}} & k_{\text{on}}^{\text{ion}} \cdot [\text{Na}^+]_{\text{cld}} \\ k_{\text{off}}^{\text{Na}} & -k_{\text{on}}^{\text{ion}} \cdot [\text{Na}^+]_{\text{cld}} - k_{\text{off}}^{\text{Cl}} & k_{\text{on}}^{\text{ion}} \cdot [\text{Cl}^-]_{\text{cld}} \\ k_{\text{off}}^{\text{Cl}} & -k_{\text{on}}^{\text{ion}} \cdot [\text{Cl}^-]_{\text{cld}} - k_{\text{off}}^{\text{K}} & k_{\text{on}}^{\text{ion}} \cdot [\text{K}^+]_{\text{cld}} \\ k_{\text{off}}^{\text{K}} & -k_{\text{on}}^{\text{ion}} \cdot [\text{K}^+]_{\text{cld}} - k_{\text{off}}^{\text{Cl}} & k_{\text{on}}^{\text{ion}} \cdot [\text{Cl}^-]_{\text{cld}} \end{bmatrix} \quad \#(120)$$

$$\begin{bmatrix} [E_1] \\ [E_1\text{Na}] \\ [E_1\text{NaCl}] \\ [E_1\text{NaClK}] \\ [E_1\text{NaClKCl}] \\ [E_2\text{NaClKCl}] \\ [E_2\text{ClKCl}] \\ [E_2\text{KCl}] \\ [E_2\text{Cl}] \\ [E_2] \end{bmatrix} = \begin{bmatrix} a_1 & a_2 & 0 & 0 & 0 & 0 & 0 & 0 & 0 & a_3 \\ b_1 & b_2 & b_3 & 0 & 0 & 0 & 0 & 0 & 0 & 0 \\ 0 & c_1 & c_2 & c_3 & 0 & 0 & 0 & 0 & 0 & 0 \\ 0 & 0 & d_1 & d_2 & d_3 & 0 & 0 & 0 & 0 & 0 \\ 0 & 0 & 0 & e_1 & e_2 & e_3 & 0 & 0 & 0 & 0 \\ 0 & 0 & 0 & 0 & f_1 & f_2 & f_3 & 0 & 0 & 0 \\ 0 & 0 & 0 & 0 & 0 & g_1 & g_2 & g_3 & 0 & 0 \\ 0 & 0 & 0 & 0 & 0 & 0 & h_1 & h_2 & h_3 & 0 \\ 0 & 0 & 0 & 0 & 0 & 0 & 0 & i_1 & i_2 & i_3 \\ 1 & 1 & 1 & 1 & 1 & 1 & 1 & 1 & 1 & 1 \end{bmatrix}^{-1} \begin{bmatrix} 0 \\ 0 \\ 0 \\ 0 \\ 0 \\ 0 \\ 0 \\ 0 \\ 0 \\ 1 \end{bmatrix} \quad \#(121)$$

$$K_{\text{Na}} = 15.8 \cdot 10^{-3} \text{ L} \cdot \text{mmol}^{-1} \#(122)$$

$$K_{\text{Cl}} = 216.9 \cdot 10^{-3} \text{ L} \cdot \text{mmol}^{-1} \#(123)$$

$$K_{\text{K}} = 9.22 \cdot 10^{-3} \text{ L} \cdot \text{mmol}^{-1} \#(124)$$

$$k_f^{\text{full}} = 1002.0 \cdot 10^{-3} \text{ ms}^{-1} \#(125)$$

$$k_b^{\text{full}} = 2255.0 \cdot 10^{-3} \text{ ms}^{-1} \#(126)$$

$$k_f^{\text{empty}} = 37767 \cdot 10^{-3} \text{ ms}^{-1} \#(127)$$

$$k_b^{\text{empty}} = \frac{K_{\text{Na}} \cdot K_{\text{Cl}} \cdot K_{\text{K}} \cdot K_{\text{Cl}} \cdot k_f^{\text{full}} \cdot k_f^{\text{empty}}}{K_{\text{Na}} \cdot K_{\text{Cl}} \cdot K_{\text{K}} \cdot K_{\text{Cl}} \cdot k_b^{\text{full}}} \text{ ms}^{-1} \#(128)$$

$$k_{\text{on}}^{\text{ion}} = 100 \text{ L} \cdot \text{mmol}^{-1} \#(129)$$

$$k_{\text{off}}^{\text{Na}} = k_{\text{on}}^{\text{ion}} / K_{\text{Na}} \#(130)$$

$$k_{\text{off}}^{\text{K}} = k_{\text{on}}^{\text{ion}} / K_{\text{K}} \#(131)$$

$$k_{\text{off}}^{\text{Cl}} = k_{\text{on}}^{\text{ion}} / K_{\text{Cl}} \#(132)$$

### A13. ER Ca<sup>2+</sup> pump current ( $I_{pCa}$ )

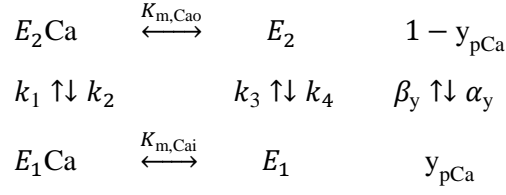

$$I_{pCa} = P_{pCa} \cdot (k_2 \cdot E_2Ca \cdot (1 - y_{pCa}) - k_1 \cdot E_1Ca \cdot y_{pCa}) \#(133)$$

$$P_{pCa} = 772.8 \#(134)$$

$$k_1 = 0.01 \#(135)$$

$$k_2 = 1 \#(136)$$

$$k_3 = 1 \#(137)$$

$$k_4 = 0.01 \#(138)$$

$$\alpha_y = k_2 \cdot E_2Ca + k_4 \cdot E_2 \#(139)$$

$$\beta_y = k_1 \cdot E_1Ca + k_3 \cdot E_1 \#(140)$$

$$E_1Ca = \left(1 + \frac{K_{m,Cai}}{[Ca^{2+}]_{up}}\right)^{-1} \#(141)$$

$$E_2Ca = \left(1 + \frac{K_{m,Cao}}{[Ca^{2+}]_i}\right)^{-1} \#(142)$$

$$E_1 = \left(1 + \frac{[Ca^{2+}]_{up}}{K_{m,Cai}}\right)^{-1} \#(143)$$

$$E_2 = \left(1 + \frac{[Ca^{2+}]_i}{K_{m,Cao}}\right)^{-1} \#(144)$$

$$K_{m,Cao} = 0.00258 \text{ mM} \#(145)$$

$$K_{m,Cai} = 0.08 \text{ mM} \#(146)$$

### A14. IP<sub>3</sub>-mediated Ca<sup>2+</sup> release current from the ER ( $I_{IP3R}$ )

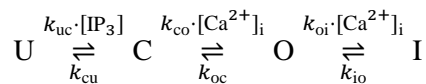

$$I_{IP3R} = P_{IP3R} \cdot ([Ca^{2+}]_{rel} - [Ca^{2+}]_i) \cdot P_{o(IP3R)} \#(147)$$

$$P_{IP3R} = 217.2\#(148)$$

$$P_{O(IP3R)} = O^3\#(149)$$

$$k_{uc} = 400 \text{ mM}^{-1} \cdot \text{ms}^{-1}\#(150)$$

$$k_{cu} = 0.37736 \text{ ms}^{-1}\#(151)$$

$$k_{co} = 20 \text{ mM}^{-1} \cdot \text{ms}^{-1}\#(152)$$

$$k_{oc} = 0.0016468 \text{ ms}^{-1}\#(153)$$

$$k_{oi} = 0.2 \text{ mM}^{-1} \cdot \text{ms}^{-1}\#(154)$$

$$k_{io} = 0.0002098 \text{ ms}^{-1}\#(155)$$

**A15. Ca<sup>2+</sup> leak from ER uptake pool ( $I_{leak}$ )**

$$I_{leak} = P_{leak} \cdot ([Ca^{2+}]_{up} - [Ca^{2+}]_i)\#(156)$$

$$P_{leak} = 1.9125\#(157)$$

**A16. Ca<sup>2+</sup> transfer between ER uptake and release pool ( $I_{tr}$ )**

$$I_{tr} = P_{tr} \cdot ([Ca^{2+}]_{up} - [Ca^{2+}]_{rel})\#(158)$$

$$P_{tr} = 205\#(159)$$

**A17. Ca<sup>2+</sup> concentration in ER uptake pool**

$$\frac{d[Ca^{2+}]_{up}}{dt} = \frac{I_{pCa} - I_{tr} - I_{leak}}{2F \cdot Vol_{up}}\#(160)$$

**A18. Ca<sup>2+</sup> concentration in ER release pool**

$$[Ca^{2+}]_{rel} = 0.5 \cdot \left( -b_{CSQN} + \sqrt{b_{CSQN}^2 + 4 \cdot c_{CSQN}} \right)\#(161)$$

$$b_{CSQN} = [CSQN]_{total} - [Ca]_{rel} + K_m\#(162)$$

$$c_{CSQN} = K_m \cdot [Ca]_{rel}\#(163)$$

$$K_m = 0.8 \text{ mM}\#(164)$$

$$[CSQN]_{total} = 10 \text{ mM}\#(165)$$

$$\frac{d[Ca]_{rel}}{dt} = \frac{I_{tr} - I_{IP3R}}{2F \cdot Vol_{rel}} \#(166)$$

### A19. Ion concentrations in cytosol

$$\frac{d[Na^+]_i}{dt} = \frac{-I_{netNa}}{F \cdot Vol_{cyt}} + D_{Na} \cdot ([Na^+]_{cld} - [Na^+]_i) \#(167)$$

$$I_{netNa} = I_{CaLNa} + I_{NaLCNNa} + 3 \cdot I_{NaK} \#(168)$$

$$D_{Na} = 0.3 \text{ ms}^{-1} \#(169)$$

$$\frac{d[K^+]_i}{dt} = \frac{-I_{netK}}{F \cdot Vol_{cyt}} + D_K \cdot ([K^+]_{cld} - [K^+]_i) \#(170)$$

$$I_{netK} = I_{K1} + I_{CaLK} + I_{NaLCNK} - 2 \cdot I_{NaK} \#(171)$$

$$D_K = 0.3 \text{ ms}^{-1} \#(172)$$

$$\frac{d[Ca]_i}{dt} = \frac{-I_{netCa}}{2F \cdot Vol_{cyt}} + D_{Ca} \cdot ([Ca^{2+}]_{cld} - [Ca^{2+}]_i) \#(173)$$

$$D_{Ca} = 0.2 \text{ ms}^{-1} \#(174)$$

$$I_{netCa} = I_{Orai} + I_{CaLCa} + I_{CaT} + I_{pCa} - I_{IP3R} - I_{leak} \#(175)$$

$$[Ca^{2+}]_i = 0.5 \cdot \left( -b_{CMDN} + \sqrt{b_{CMDN}^2 + 4 \cdot c_{CMDN}} \right) \#(176)$$

$$b_{CMDN} = [CMDN]_{total} - [Ca]_i + K_m \#(177)$$

$$c_{CMDN} = K_m \cdot [Ca]_i \#(178)$$

$$K_m = 0.00238 \text{ mM} \#(179)$$

$$[CMDN]_{total} = 0.0005 \text{ mM} \#(180)$$

$$\frac{d[Cl^-]_i}{dt} = \frac{I_{Clb}}{F \cdot Vol_{cyt}} + D_{Cl} \cdot ([Cl^-]_{cld} - [Cl^-]_i) \#(181)$$

$$D_{Cl} = 0.002 \text{ ms}^{-1} \#(182)$$

### A20. Ion concentrations in Cl<sup>-</sup> microdomain

$$\frac{d[Na^+]_{cld}}{dt} = \frac{-3 \cdot I_{NaCa}}{F \cdot Vol_{cld}} + J_{NKCC,Na} + D_{Na} \cdot ([Na^+]_i - [Na^+]_{cld}) \cdot \frac{Vol_{cyt}}{Vol_{cld}} \#(183)$$

$$\frac{d[K^+]_{\text{cld}}}{dt} = J_{\text{NKCC,K}} + D_K \cdot ([K^+]_i - [K^+]_{\text{cld}}) \cdot \frac{Vol_{\text{cyt}}}{Vol_{\text{cld}}} \#(184)$$

$$\frac{d[Ca]_{\text{cld}}}{dt} = \frac{2 \cdot I_{\text{NaCa}}}{2F \cdot Vol_{\text{cld}}} + D_{\text{Ca}} \cdot ([Ca^{2+}]_i - [Ca^{2+}]_{\text{cld}}) \cdot \frac{Vol_{\text{cyt}}}{Vol_{\text{cld}}} \#(185)$$

$$[Ca^{2+}]_{\text{cld}} = 0.5 \cdot \left( -b_{\text{CMDN}} + \sqrt{b_{\text{CMDN}}^2 + 4 \cdot c_{\text{CMDN}}} \right) \#(186)$$

$$b_{\text{CMDN}} = [\text{CMDN}]_{\text{total}} - [Ca]_{\text{cld}} + K_m \#(187)$$

$$c_{\text{CMDN}} = K_m \cdot [Ca]_{\text{cld}} \#(188)$$

$$K_m = 0.00238 \text{ mM} \#(189)$$

$$\frac{d[Cl^-]_{\text{cld}}}{dt} = \frac{I_{\text{ClCa}}}{F \cdot Vol_{\text{cld}}} + J_{\text{NKCC,Cl}} + D_{\text{Cl}} \cdot ([Cl^-]_i - [Cl^-]_{\text{cld}}) \cdot \frac{Vol_{\text{cyt}}}{Vol_{\text{cld}}} \#(190)$$

## A21. IP<sub>3</sub> concentration

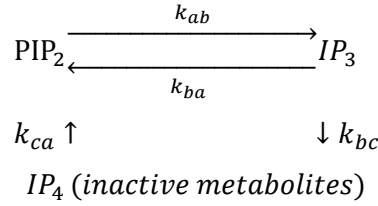

$$\frac{d[\text{IP}_3]}{dt} = k_{ab} \cdot [\text{PIP}_2] - (k_{ba} + k_{bc}) \cdot [\text{IP}_3] \#(191)$$

$$\frac{d[\text{PIP}_2]}{dt} = k_{ba} \cdot [\text{IP}_3] + k_{ca} \cdot [\text{IP}_4] - k_{ab} \cdot [\text{PIP}_2] \#(192)$$

$$\frac{d[\text{IP}_4]}{dt} = k_{bc} \cdot [\text{IP}_3] - k_{ca} \cdot [\text{IP}_4] \#(193)$$

$$[\text{PI}_{\text{total}}] = [\text{PIP}_2] + [\text{IP}_3] + [\text{IP}_4] = 3.3 \cdot 10^{-3} \#(194)$$

$$k_{ab} = 0.2 \cdot e^{\frac{V+48.5}{18.1}} \cdot \frac{[Ca^{2+}]_i}{[Ca^{2+}]_i + K_{m,\text{Cai(PI)}}} \text{ ms}^{-1} \#(195)$$

$$k_{ba} = 0.5 \cdot e^{-\frac{V+100}{28.5}} \text{ ms}^{-1} \#(196)$$

$$k_{bc} = 0.004 \text{ ms}^{-1} \#(197)$$

$$k_{ca} = 0.0035 \cdot e^{-\frac{V+100}{25.5}} \text{ ms}^{-1} \#(198)$$

$$K_{m,\text{Cai(PI)}} = 0.00001 \text{ mM} \#(199)$$

## Supplement tables

**Table A1. Glossary**

| Parameter                 | Unit                             | Description                                                          |
|---------------------------|----------------------------------|----------------------------------------------------------------------|
| $I_{\text{total}}$        | pA                               | Total current of ion channels, exchanger, and pump                   |
| $I_{\text{ext}}$          | pA                               | Externally applied current                                           |
| $I_{\text{CaL}}$          | pA                               | L-type $\text{Ca}^{2+}$ current                                      |
| $I_{\text{CaL}X}$         | pA                               | ion X component of L-type $\text{Ca}^{2+}$ current                   |
| $I_{\text{CaT}}$          | pA                               | T-type $\text{Ca}^{2+}$ current                                      |
| $I_{\text{K1}}$           | pA                               | Inward rectifier $\text{K}^{+}$ current                              |
| $I_{\text{NaLCN}}$        | pA                               | $\text{Na}^{+}$ -leak current                                        |
| $I_{\text{NaLCN}X}$       | pA                               | ion X component of $\text{Na}^{+}$ -leak current                     |
| $I_{\text{ClCa}}$         | pA                               | $\text{Ca}^{2+}$ -activated $\text{Cl}^{-}$ current                  |
| $I_{\text{Clb}}$          | pA                               | Background $\text{Cl}^{-}$ current                                   |
| $I_{\text{Orai}}$         | pA                               | Current carried by Orai (store-operated $\text{Ca}^{2+}$ entry)      |
| $I_{\text{NaCa}}$         | pA                               | $\text{Na}^{+}/\text{Ca}^{2+}$ exchange current                      |
| $I_{\text{NaK}}$          | pA                               | $\text{Na}^{+}/\text{K}^{+}$ exchange current                        |
| $J_{\text{NKCC}}$         | $\text{mM} \cdot \text{ms}^{-1}$ | Flux by Na-K-2Cl cotransporter (NKCC1)                               |
| $J_{\text{NKCC}X}$        | $\text{mM} \cdot \text{ms}^{-1}$ | ion X component of $J_{\text{NKCC}}$                                 |
| $I_{\text{pCa}}$          | pA                               | ER $\text{Ca}^{2+}$ pump current                                     |
| $I_{\text{IP3R}}$         | pA                               | $\text{IP}_3$ -mediated $\text{Ca}^{2+}$ release current from the ER |
| $P_{\text{o(IP3R)}}$      | unitless                         | Probability of $\text{IP}_3$ receptor in conducting state            |
| $I_{\text{leak}}$         | pA                               | $\text{Ca}^{2+}$ leak from ER uptake pool                            |
| $I_{\text{tr}}$           | pA                               | $\text{Ca}^{2+}$ transfer between ER uptake and release pool         |
| $\alpha_X$                | $\text{ms}^{-1}$                 | Forward rate constant for gating variable X                          |
| $\beta_X$                 | $\text{ms}^{-1}$                 | Backward rate constant for gating variable X                         |
| $\tau_X$                  | ms                               | Time constant of gating variable X                                   |
| $X_{\infty}$              | unitless                         | Steady-state value of gating variable X                              |
| $E_X$                     | mV                               | Equilibrium potential for ion X                                      |
| $V$                       | mV                               | Membrane potential                                                   |
| $t$                       | ms                               | Time                                                                 |
| $\text{CF}_X$             | mM                               | Constant field for intracellular and extracellular ion X             |
| $\text{CF}_{X,\text{md}}$ | mM                               | Constant field for microdomain and extracellular ion X               |
| $G_X$                     | $\text{pA} \cdot \text{mV}^{-1}$ | Maximum conductance of channel X                                     |
| $z_X$                     | unitless                         | Valence of the ion X                                                 |
| $[\text{X}]_i$            | mM                               | Intracellular concentration of ion X                                 |
| $[\text{X}]_{\text{cld}}$ | mM                               | Concentration of ion X in $\text{Cl}^{-}$ microdomain                |

|                   |    |                                                |
|-------------------|----|------------------------------------------------|
| $[X]_o$           | mM | Extracellular concentration of ion X           |
| $[Ca]_{rel}$      | mM | Total calcium concentration in ER release pool |
| $[Ca^{2+}]_{rel}$ | mM | Free calcium concentration in ER release pool  |
| $[Ca^{2+}]_{up}$  | mM | Free calcium concentration in ER uptake pool   |

**Table A2. General model constants**

| Parameter   | Value   | Unit                                                            | Description                              |
|-------------|---------|-----------------------------------------------------------------|------------------------------------------|
| $C_m$       | 25      | pF                                                              | Membrane capacitance                     |
| $Vol_{cyt}$ | 715.5   | $\mu\text{m}^3$                                                 | Cell volume accessible for ion diffusion |
| $Vol_{up}$  | 21.465  | $\mu\text{m}^3$                                                 | Volume of ER uptake pool                 |
| $Vol_{rel}$ | 7.155   | $\mu\text{m}^3$                                                 | Volume of ER release pool                |
| $Vol_{cld}$ | 35.775  | $\mu\text{m}^3$                                                 | Volume of $\text{Cl}^-$ microdomain      |
| F           | 96.4867 | $\text{C}\cdot\text{mmol}^{-1}$                                 | Faraday constant                         |
| R           | 8.314   | $\text{C}\cdot\text{mV}\cdot\text{K}^{-1}\cdot\text{mmol}^{-1}$ | Gas constant                             |
| T           | 309.15  | K                                                               | Absolute temperature                     |

**Table A3. Initial values (gating variables)**

| Ion carriers | Parameter     | Value                |
|--------------|---------------|----------------------|
| $I_{CaL}$    | m             | $8.980\cdot 10^{-8}$ |
|              | h             | $0.680\cdot 10^{-1}$ |
| $I_{CaT}$    | d             | $4.429\cdot 10^{-4}$ |
|              | f             | $7.262\cdot 10^{-1}$ |
| $I_{ClCa}$   | $O_{ClCa}$    | $3.249\cdot 10^{-3}$ |
| $I_{NaCa}$   | $y_{NaCa}$    | $9.798\cdot 10^{-1}$ |
| $I_{NaK}$    | $y_{NaK}$     | $5.983\cdot 10^{-1}$ |
| $I_{pCa}$    | $y_{pCa}$     | $4.226\cdot 10^{-1}$ |
| $I_{IP3R}$   | $P_{o(IP3R)}$ | $7.009\cdot 10^{-4}$ |

**Table A4. Initial values (membrane potential and concentrations)**

| Parameter                       | Value                 | Unit |
|---------------------------------|-----------------------|------|
| $V$                             | -72.332               | mV   |
| $[\text{Na}^+]_o$               | 140.0                 | mM   |
| $[\text{Na}^+]_i$               | 6.321                 | mM   |
| $[\text{Na}^+]_{\text{cld}}$    | 6.321                 | mM   |
| $[\text{K}^+]_o$                | 5.4                   | mM   |
| $[\text{K}^+]_i$                | 135.6                 | mM   |
| $[\text{K}^+]_{\text{cld}}$     | 135.6                 | mM   |
| $[\text{Cl}^-]_o$               | 140                   | mM   |
| $[\text{Cl}^-]_i$               | 87.290                | mM   |
| $[\text{Cl}^-]_{\text{cld}}$    | 87.464                | mM   |
| $[\text{Ca}^{2+}]_o$            | 1.8                   | mM   |
| $[\text{Ca}]_i$                 | $1.071 \cdot 10^{-4}$ | mM   |
| $[\text{Ca}^{2+}]_i$            | $8.913 \cdot 10^{-5}$ | mM   |
| $[\text{Ca}]_{\text{cld}}$      | $1.717 \cdot 10^{-4}$ | mM   |
| $[\text{Ca}^{2+}]_{\text{cld}}$ | $1.433 \cdot 10^{-4}$ | mM   |
| $[\text{Ca}]_{\text{rel}}$      | 8.065                 | mM   |
| $[\text{Ca}^{2+}]_{\text{rel}}$ | 1.517                 | mM   |
| $[\text{Ca}^{2+}]_{\text{up}}$  | 1.783                 | mM   |
| $[E_1]$                         | $1.579 \cdot 10^{-3}$ | mM   |
| $[E_1\text{Na}]$                | $3.489 \cdot 10^{-3}$ | mM   |
| $[E_1\text{NaCl}]$              | $1.059 \cdot 10^{-1}$ | mM   |
| $[E_1\text{NaClK}]$             | $5.271 \cdot 10^{-3}$ | mM   |
| $[E_1\text{NaClKCl}]$           | $1.600 \cdot 10^{-1}$ | mM   |
| $[E_2\text{NaClKCl}]$           | $6.039 \cdot 10^{-2}$ | mM   |
| $[E_2\text{ClKCl}]$             | $6.046 \cdot 10^{-1}$ | mM   |
| $[E_2\text{KCl}]$               | $3.186 \cdot 10^{-2}$ | mM   |
| $[E_2\text{Cl}]$                | $2.548 \cdot 10^{-2}$ | mM   |
| $[E_2]$                         | $1.340 \cdot 10^{-3}$ | mM   |
| $[\text{IP}_3]$                 | $3.396 \cdot 10^{-4}$ | mM   |
| $[\text{PIP}_2]$                | $1.364 \cdot 10^{-3}$ | mM   |
